# Supplementary figures and images for: Automated visual tracking for studying the ontogeny of zebrafish swimming
Source: Oxford University Press journal article supplement (doi:10.1242/jeb.010272), 2008-03-29

# Age 5 days

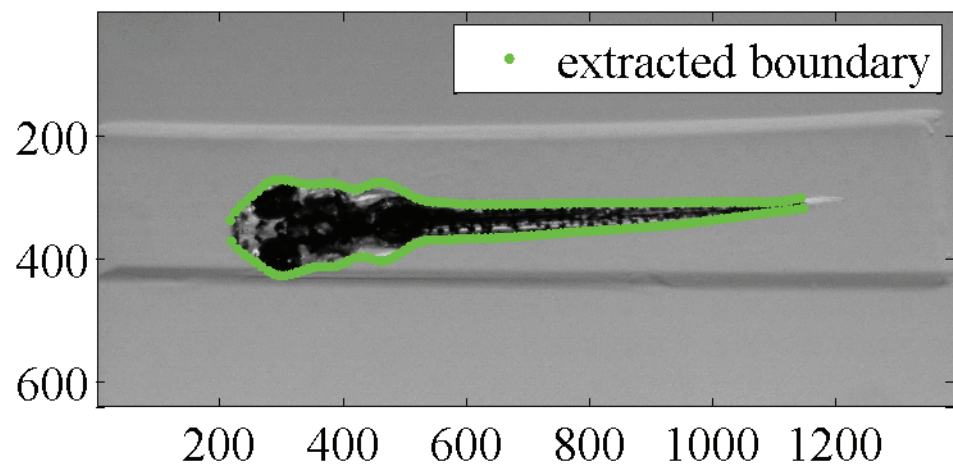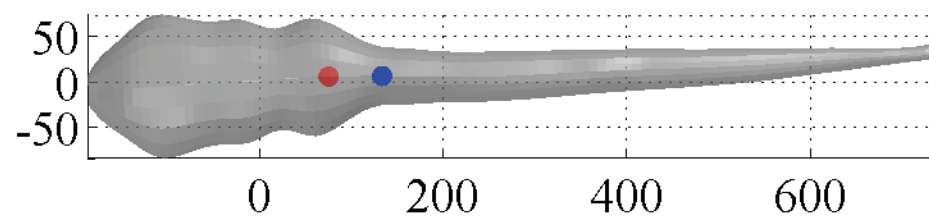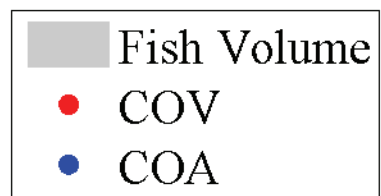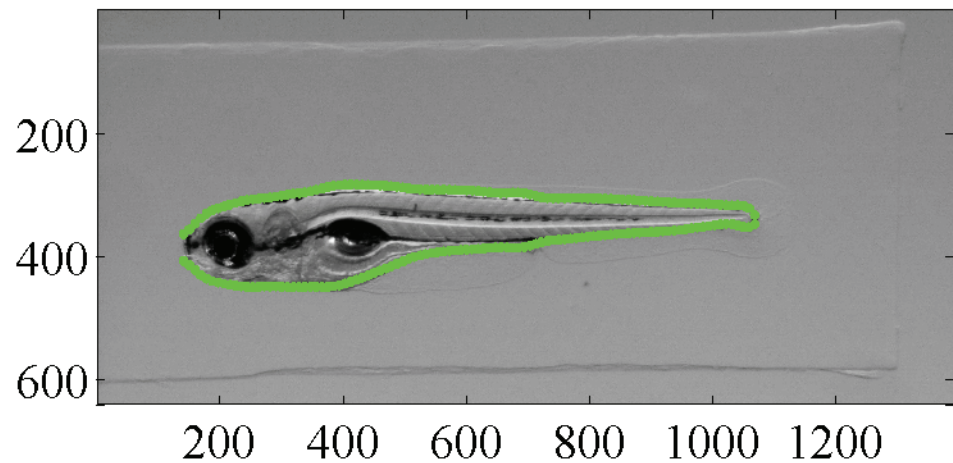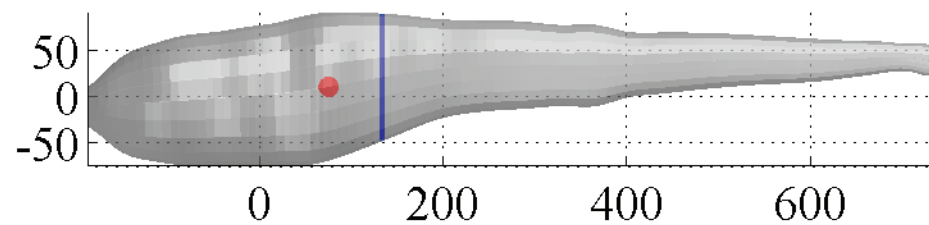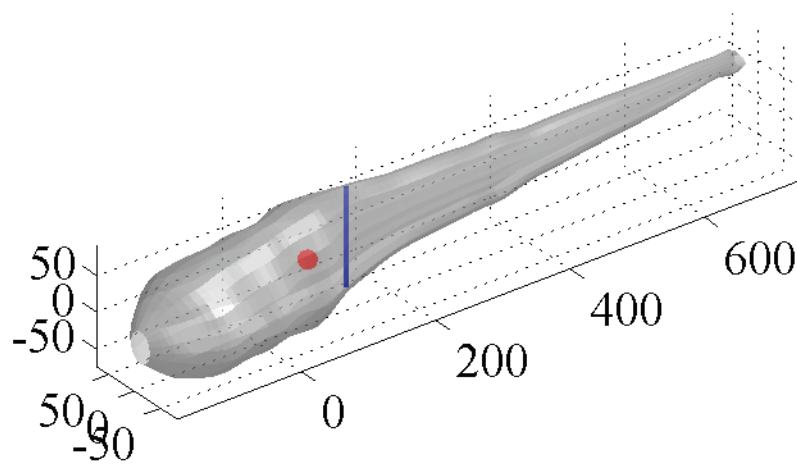

Supplement: jeb010272-sup-010272-figs1.pdf [file jeb010272-sup-010272-figs1.pdf]

# Age 15 days

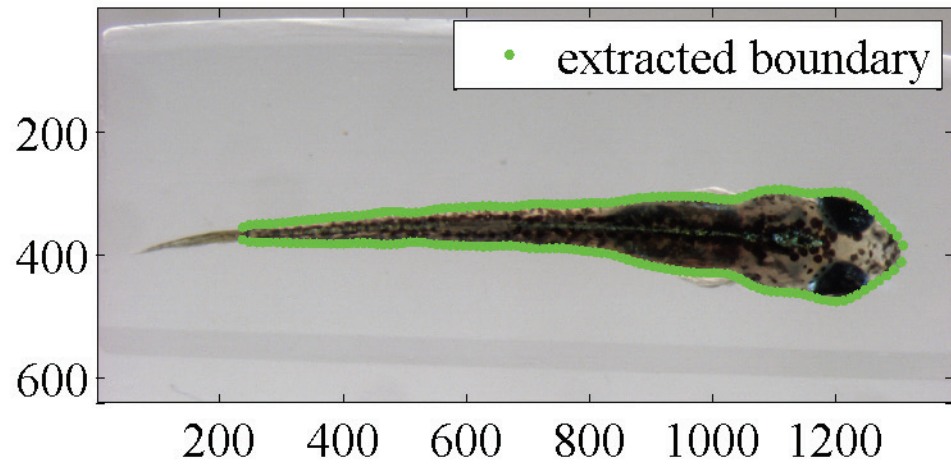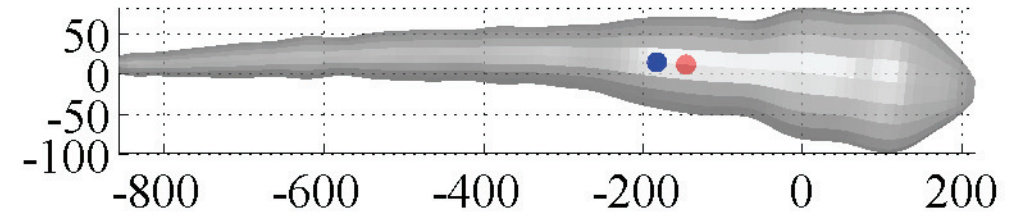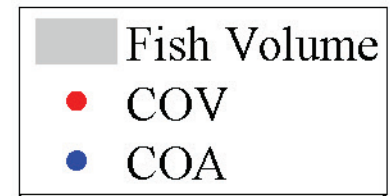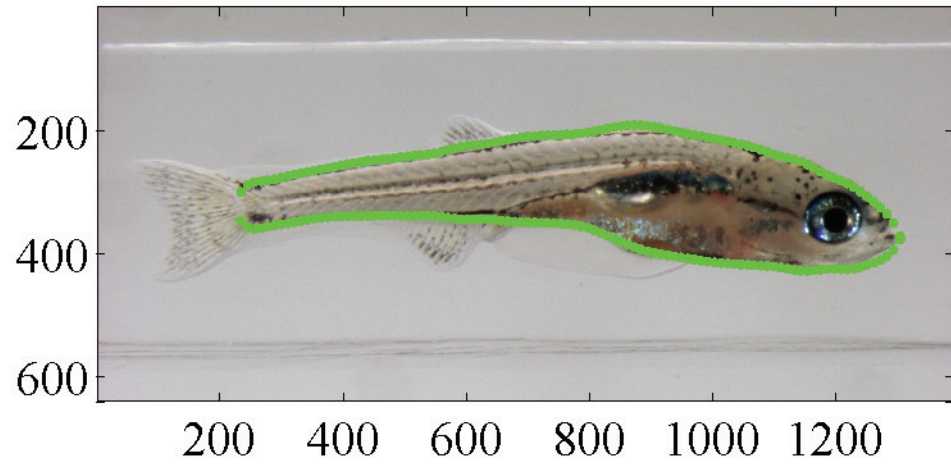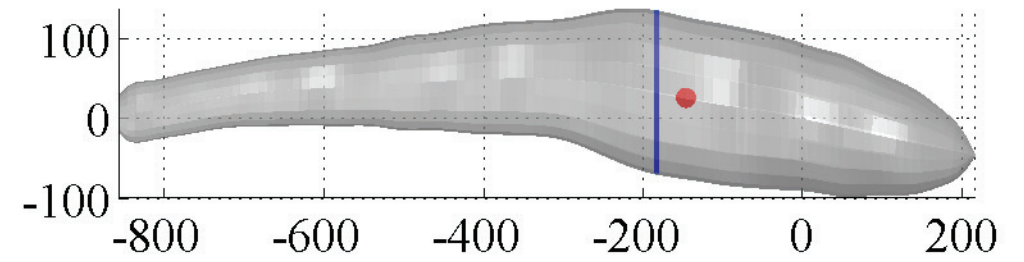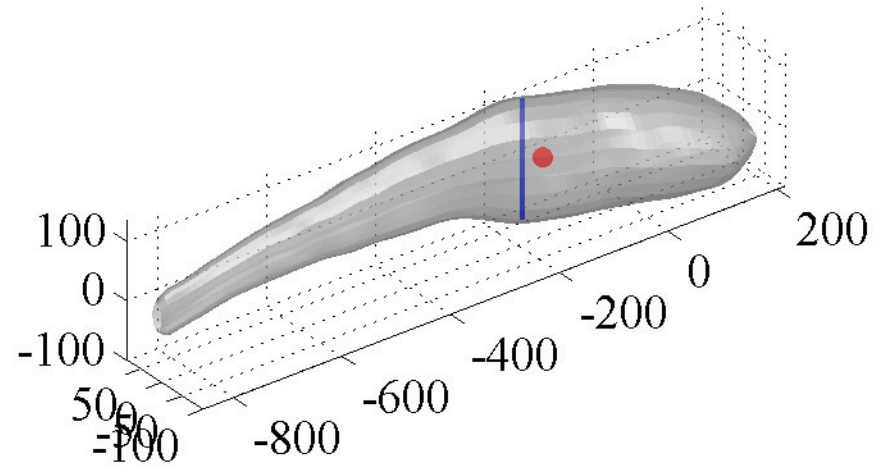

Supplement: jeb010272-sup-010272-figs2.pdf [file jeb010272-sup-010272-figs2.pdf]

# Age 28 days

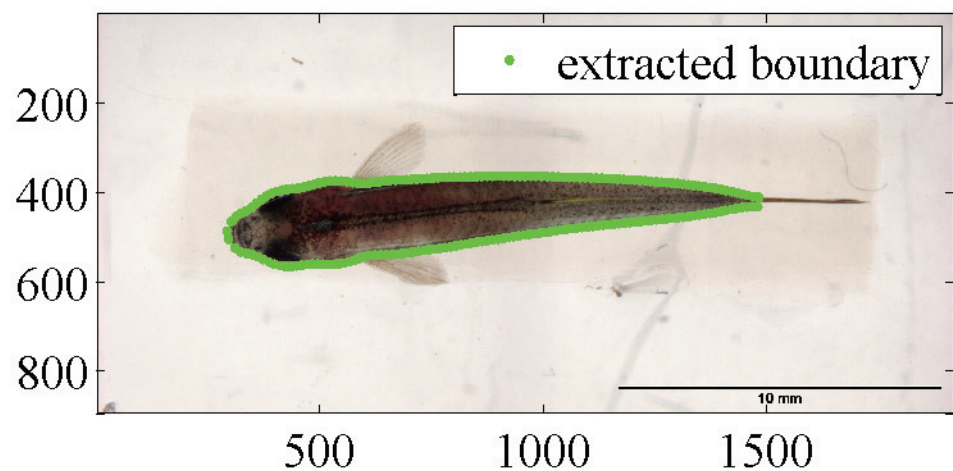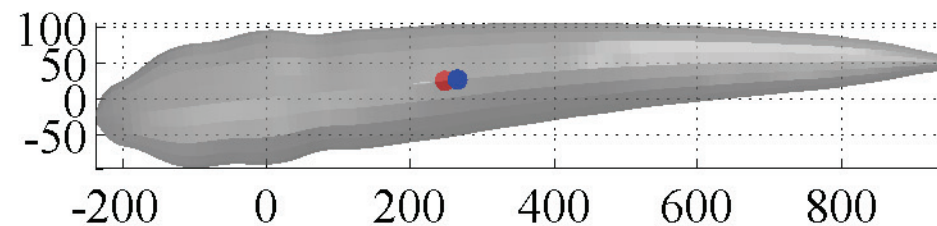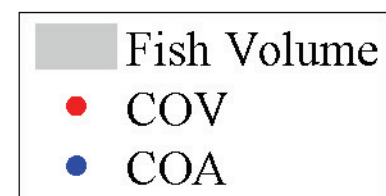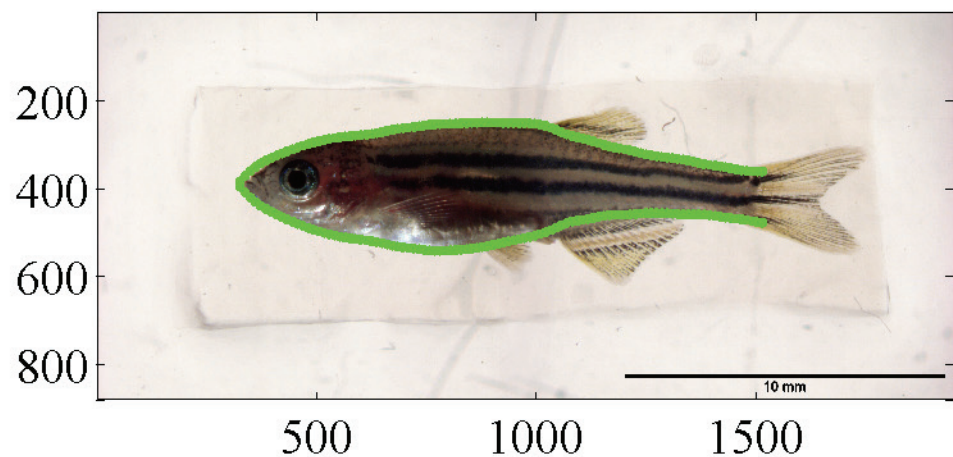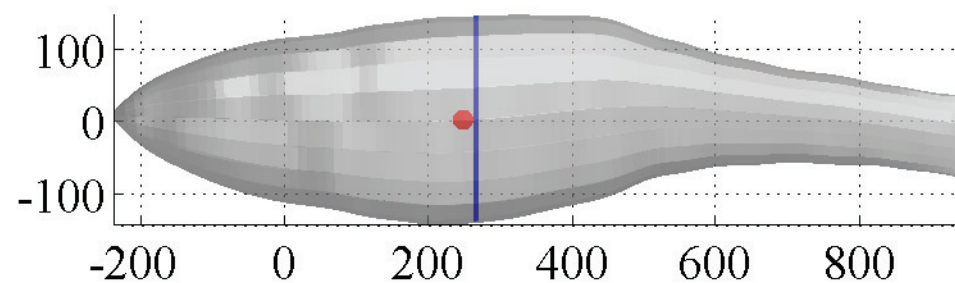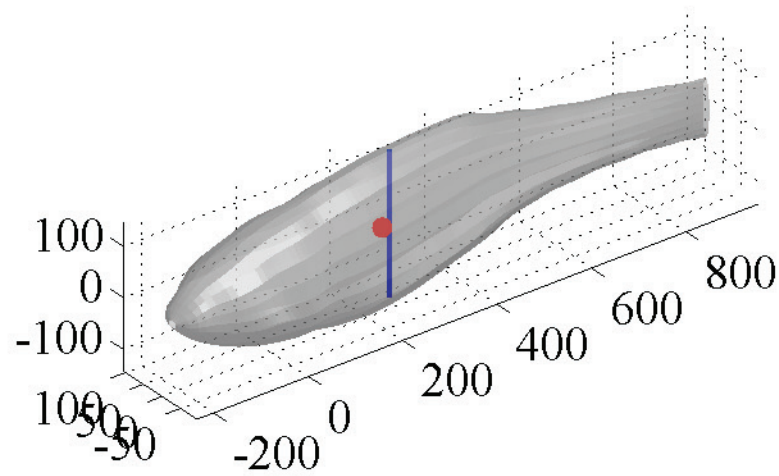

Supplement: jeb010272-sup-010272-figs3.pdf [file jeb010272-sup-010272-figs3.pdf]

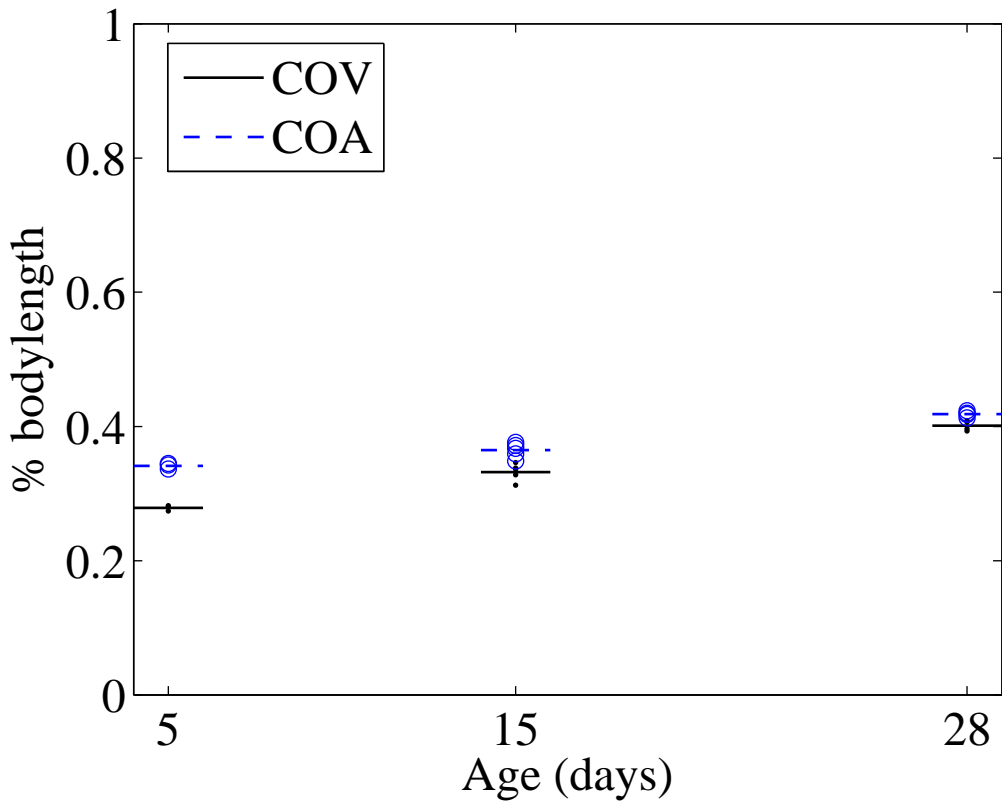

Supplement: jeb010272-sup-010272-figs4.pdf [file jeb010272-sup-010272-figs4.pdf]
